# Supplementary material for: The Multilateral Efficacy of Chitosan and Trichoderma on Sugar Beet
Source: MDPI journal article supplement (doi:10.3390/jof8020137), 2022-01-29
Supplement: s1 [file s1]

Supplementary Information

# The Multilateral Efficacy of Chitosan and *Trichoderma* on Sugar Beet

Lisa Kappel <sup>1,2</sup>, Nicole Kosa <sup>2</sup> and Sabine Gruber <sup>1,2,\*</sup>

<sup>1</sup> Department of Microbiology, University of Innsbruck, 6020 Innsbruck, Austria; lisa.kappel@uibk.ac.at

<sup>2</sup> Department of Bioengineering, FH Campus Wien, University of Applied Sciences, 1190 Vienna, Austria; nicole.kosa@stud.fh-campuswien.ac.at

\* Correspondence: sabine.gruber@fh-campuswien.ac.at

## Appendix A: Supplementary tables

Supplementary Table S1: RT-PCR primers for *T. atroviride* used in this study

| pID (JGI) <sup>1</sup> | gene           | primer name    | Sequence (5' - 3')    | number of cycles | source     |
|------------------------|----------------|----------------|-----------------------|------------------|------------|
| 28913                  | <i>cda1</i>    | Ta_cda1_RT     | TCCTCCATGCAGGACTCTGA  | 30               | this study |
|                        |                | Ta_cda1_RTa    | GCTTGGAGCAGCAGTTTTTGT |                  | this study |
| 147996                 | <i>cda2</i>    | Ta_cda2_RT     | CAAAGTCATTGCCCTGTCGC  | 30               | this study |
|                        |                | Ta_cda2_RTa    | AGACGTCAGTCCGTGA      |                  | this study |
| 78914                  | <i>cda3</i>    | Ta_cda3_RT     | CACTCGTCCGTCATAGAGGC  | 30               | this study |
|                        |                | Ta_cda3_RTa    | CCACAGCGTCTTCCAATTGC  |                  | this study |
| 291124                 | <i>cda4</i>    | Ta_cda4_RT     | ACCACCAAAAGGGAGTGTG   | 30               | this study |
|                        |                | Ta_cda4_RTa    | ACCGGCCATTGGAGGATTTC  |                  | this study |
| 292288                 | <i>cda5</i>    | Ta_cda5_RT     | CAACTCCTCGACGTGTTGGA  | 30               | this study |
|                        |                | Ta_cda5_RTa    | GTGCAAGTAGCTGTCGGTCT  |                  | this study |
| 142446                 | <i>cda6</i>    | Ta_cda6_RT     | CTGCCAGGCCTACTATCTGC  | 30               | this study |
|                        |                | Ta_cda6_RTa    | TCATGCGTCCTTTCGTAGCA  |                  | this study |
| 54365                  | <i>cho1</i>    | Ta_cho1_RT     | GCTCCAACAACTCTCGGGA   | 30               | this study |
|                        |                | Ta_cho1_RTa    | TTATCGCCGCTCAGACCATC  |                  | this study |
| 80199                  | <i>cho2</i>    | Ta_cho2_RT     | GCGACATTCCTCAATGCCATC | 30               | this study |
|                        |                | Ta_cho2_RTa    | GCTGTTCTCAAAATCCGCCG  |                  | this study |
| 145108                 | <i>cho3</i>    | Ta_cho3_RT     | TATGGCGAGACAGCGTTCAA  | 30               | this study |
|                        |                | Ta_cho3_RTa    | CCGCTTGAGGTTCCAAGACT  |                  | this study |
| 197013                 | <i>cho4</i>    | Ta_cho4_RT     | GCGGTCTTCCAAATGCCATT  | 30               | this study |
|                        |                | Ta_cho4_RTa    | CAGGCTGGTAACGGGTTGAT  |                  | this study |
| 216890                 | <i>cho5</i>    | Ta_cho5_RT     | ACCATCACCAGCTACAAGGC  | 30               | this study |
|                        |                | Ta_cho5_RTa    | ATGCAGGAGGAGGAGGAGAG  |                  | this study |
| 16857                  | <i>cho6</i>    | Ta_cho6_RT     | GTAGCAGACCTGGCTGGAAG  | 30               | this study |
|                        |                | Ta_cho6_RTa    | GAAGCACCAGCACAATGTCC  |                  | this study |
| 131598                 | <i>chi18-5</i> | Ta_chi18-5_RT  | GTCTCTGGAGATGCCTACGC  | 30               | this study |
|                        |                | Ta_chi18-5_RTa | AGTCGAGAACTTGCCAAGG   |                  | this study |
| 136120                 | <i>nag1</i>    | Ta_nag1_RT     | GAGCGATGTCCTACAGCCTC  | 30               | this study |
|                        |                | Ta_nag1_RTa    | GGGCCAGATGATGTTGTCCA  |                  | this study |
| 299956                 | <i>gfa1</i>    | Ta_gfa1_RT     | TCATCGAGGGTCTTGGAAC   | 30               | this study |
|                        |                | Ta_gfa1_RTa    | TCGACAGTGACAGACTTGGC  |                  | this study |

|        |             |              |                       |    |            |
|--------|-------------|--------------|-----------------------|----|------------|
| 302952 | <i>epl1</i> | Ta_epl1_RTa  | CTTGCTCTCTTCACCGCCGC  | 27 | [1]        |
|        |             | Ta_epl1_RTa  | CCGTTGGTCAGGGCATTTCAT |    | [1]        |
| 300828 | <i>tef1</i> | Ta_tef1_RT2s | CGACATTGCCCTCTGGAAGT  | 20 | this study |
|        |             | Ta_tef1_RT2a | ATCCTGAAGGGGAAGACGGA  |    | this study |

*cda*...predicted chitin deacetylase, *cho*...predicted chitosanase, *chi18-5*... endochitinase, *nag1*... N-acetylglucosaminidase, *gfa1*... predicted glucosamine-fructose-6-phosphate aminotransferase, *epl1*...ceratoplatenin, *tef1*... translation elongation factor as housekeeping gene <sup>1</sup><https://mycocosm.jgi.doe.gov/Triat2/Triat2.home.html> .

Supplementary Table S2: RT-qPCR primers for *B. vulgaris* used in this study

| GenBank identifier/<br>reference sequence <sup>1</sup> | gene  | primer name       | Sequence (5' - 3')           | source     |
|--------------------------------------------------------|-------|-------------------|------------------------------|------------|
| GQ375163.1                                             | DMRL  | qRT_Bvulg_DMRLf   | TCCGCCTCCTCTGGAATACT         | this study |
|                                                        |       | qRT_Bvulg_DMRLr   | CGCTGCCTCAGAACCCTTAT         | this study |
| X75946.1                                               | GLU   | qRT_Bvulg_GLUf    | CAACTTACCTTCCGAGGAAG         | [2]        |
|                                                        |       | qRT_Bvulg_GLUr    | CTCTAACCCTTGGAGGGTC          | this study |
| S66038.1                                               | SE2   | qRT_Bvulg_SE2f    | ATTGTCATATACTGGGGCC          | [2]        |
|                                                        |       | qRT_Bvulg_SE2r    | TTGTAGCAGGGTCACAGTGC         | this study |
| BI073261.1                                             | GST   | qRT_Bvulg_GSTf    | GCTTTGGATTTGTGGACATTGC       | this study |
|                                                        |       | qRT_Bvulg_GSTr    | TCGGACACTCTGCCTCTACA         | this study |
| BQ585675.1                                             | PAL   | qRT_Bvulg_PALf    | GAAGATCGGAGCCTTCGAGG         | this study |
|                                                        |       | qRT_Bvulg_PALr    | TTACCACTCTCGTAGGCAGC         | this study |
| BQ593253.1                                             | AAT   | qRT_Bvulg_AATf    | GCAAGACACCCACGACTTCT         | this study |
|                                                        |       | qRT_Bvulg_AATr    | AGCAAACGCCTTGGAAGGC          | this study |
| XM_010676890.2                                         | PR-3  | qRT_Bvulg_PR-3f   | CACTGGAGGATGGGCTACTG         | this study |
|                                                        |       | qRT_Bvulg_PR-3r   | CCACCCTCCAACGATGACAT         | this study |
| XM_010679634.2                                         | GAPDH | qRT_Bvulg_GAPDHf  | CATCAAGGCGGAATCAGAAGG        | [3]        |
|                                                        |       | qRT_Bvulg_GAPD Hr | ACGAGCTTTGCGAAGTGGTC         | [3]        |
| XM_010671243.2                                         | TUB1  | qRT_Bvulg_TUBf    | CTATGCATCTTCACTTTGAAACAGTTTT | [4]        |
|                                                        |       | qRT_Bvulg_TUBr    | CTAGAAGAGGCTGACGAGAAAGAAG    | [4]        |
| XM_010673056.2                                         | ACT7  | qRT_Bvulg_ACT7f   | GGCAAACAGGGAAAAGATGA         | this study |
|                                                        |       | qRT_Bvulg_ACT7r   | GGCTCACACCATCACCAGAA         | this study |

GLU... predicted glucanase, SE2/PR-3... predicted chitinases, AAT... predicted aspartate aminotransferase, PAL... predicted phenylalanine ammonia lyase, GST... predicted glutathione-S-transferase, DMRL... predicted 6,7-dimethyl-8-ribityl lumazine synthase; housekeeping genes: GAPDH... predicted glyceraldehyde-3-phosphate dehydrogenase, TUB1... predicted tubulin, ACT7... predicted actin.

<sup>1</sup><https://www.ncbi.nlm.nih.gov/nuccore/>

Supplementary Table S3: Expression analysis of indicator genes in *B. vulgaris* corresponding to Figure 4D.

| gene # | 0.1% HMW CHSN      |                    | <i>T. atroviride</i> spores |                    |
|--------|--------------------|--------------------|-----------------------------|--------------------|
|        | t1                 | t2                 | t1                          | t2                 |
| GLU    | 0.387 <sup>a</sup> | 0.553              | 0.206 <sup>b</sup>          | 0.577              |
| SE2    | 0.922              | 0.926              | 0.411 <sup>b</sup>          | 0.873              |
| PR-3   | 1.742 <sup>a</sup> | 1.328              | 1.985 <sup>b</sup>          | 1.785 <sup>b</sup> |
| AAT    | 1.422 <sup>a</sup> | 0.991              | 1.081                       | 1.261              |
| PAL    | 1.385 <sup>b</sup> | 1.574 <sup>b</sup> | 1.093                       | 1.157              |
| GST    | 1.209 <sup>b</sup> | 1.966 <sup>c</sup> | 0.964                       | 0.992              |
| DMRL   | 1.264 <sup>b</sup> | 0.861              | 1.054                       | 0.823              |

Statistical significance indicated with: a,  $p < 0.001$ ; b,  $p < 0.01$ ; c,  $p < 0.05$

Supplementary Table S4: Expression analysis of indicator genes in *B. vulgaris* seedlings corresponding to Figure 5.

| gene # | seeds coated<br>1% HMW CHSN |       | seeds coated<br><i>T. atroviride</i> spores |                    | uncoated<br>phytagel with 0.1%<br>HMW CHSN |                    |
|--------|-----------------------------|-------|---------------------------------------------|--------------------|--------------------------------------------|--------------------|
|        | SHOOT                       | ROOT  | SHOOT                                       | ROOT               | SHOOT                                      | ROOT               |
| PR-3   | 0.732                       | 1.030 | 2.471 <sup>c</sup>                          | 2.614              | 3.882 <sup>a</sup>                         | 5.988 <sup>c</sup> |
| GLU    | 1.117                       | 0.889 | 2.953                                       | 5.430              | 1.504                                      | 7.753 <sup>b</sup> |
| SE2    | 0.854                       | 1.695 | 3.368 <sup>b</sup>                          | 7.211 <sup>b</sup> | 0.340 <sup>c</sup>                         | 4.215 <sup>b</sup> |
| PAL    | 0.891                       | 0.963 | 1.022                                       | 1.266              | 0.544 <sup>c</sup>                         | 1.415              |
| AAT    | 1.192                       | 1.356 | 2.420 <sup>a</sup>                          | 2.945 <sup>a</sup> | 1.051                                      | 2.409 <sup>b</sup> |
| DMRL   | 1.317 <sup>a</sup>          | 1.061 | 1.931 <sup>a</sup>                          | 1.693 <sup>a</sup> | 1.427 <sup>a</sup>                         | 1.390 <sup>b</sup> |
| GST    | 1.048                       | 1.349 | 3.123 <sup>b</sup>                          | 1.998 <sup>b</sup> | 0.533 <sup>c</sup>                         | 3.122 <sup>b</sup> |

Statistical significance indicated with: a,  $p < 0.001$ ; b,  $p < 0.01$ ; c,  $p < 0.05$

## Appendix B: Supplementary figures

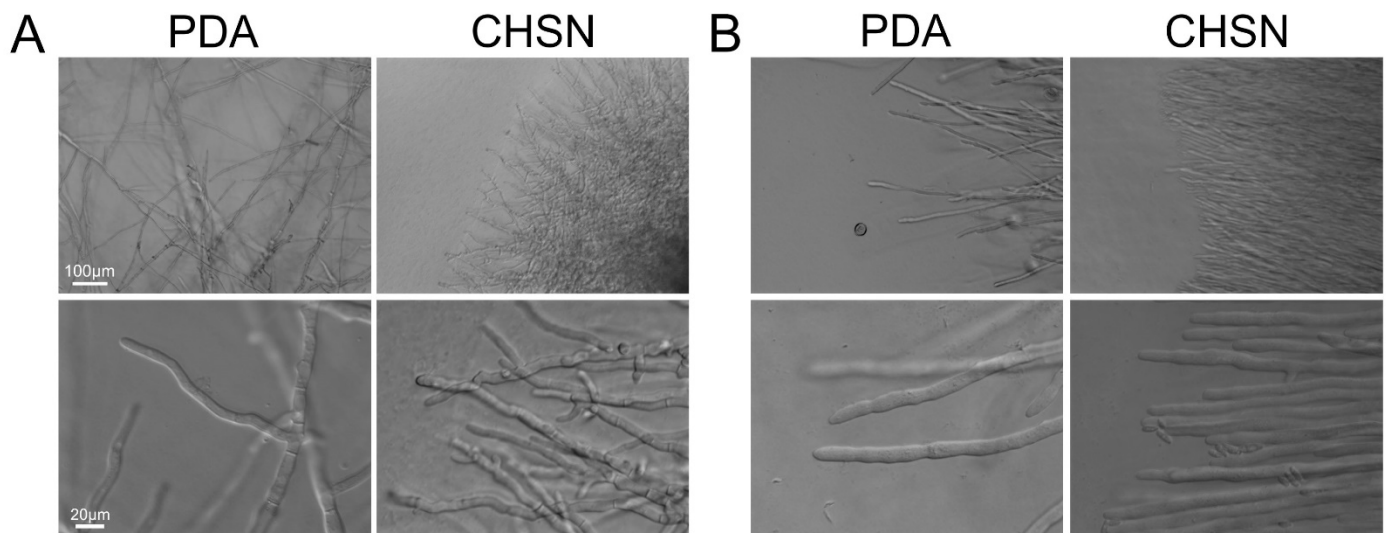

**Supplementary Figure S1: Hyphal agglomeration of *C. beticola* and *F. oxysporum* on chitosan.** Microscopic analysis of *C. beticola* (A) and *F. oxysporum* (B) on PDA or PDA supplemented with 0.6 mg ml<sup>-1</sup> LMW chitosan after growth for 120 h and 48 h, respectively. Scale bars are indicated.

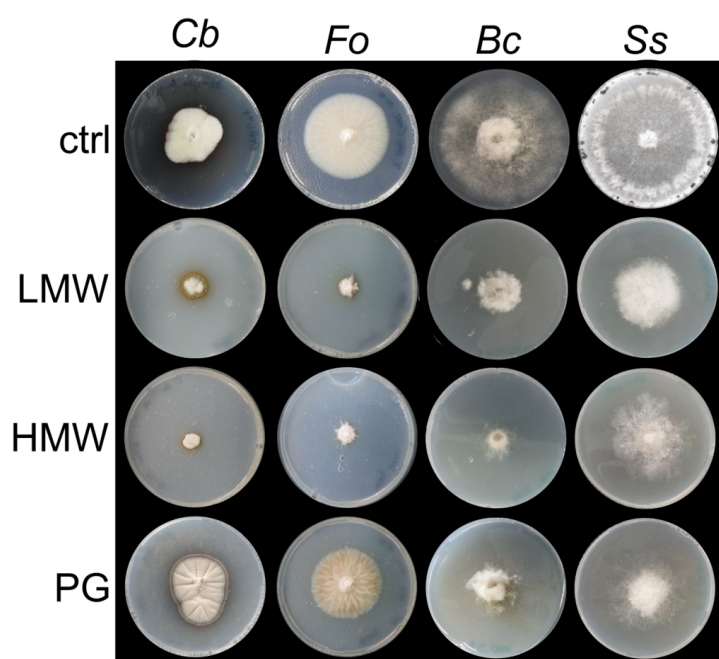

**Supplementary Figure S2: Growth of pathogens on chitosans.** Figure corresponds to Figure 2 in the manuscript, showing growth of the pathogens in absence of confrontation with *T. atroviride*. Strains were cultured on (PDA, ctrl) or supplemented with 2 mg ml<sup>-1</sup> LMW, low molecular weight; HMW, high molecular weight; PG, practical grade chitosan. *Cb*, *C. beticola*; *Fo*, *F. oxysporum*; *Bc*, *B. cinerea*; *Ss*, *S. sclerotiorum*

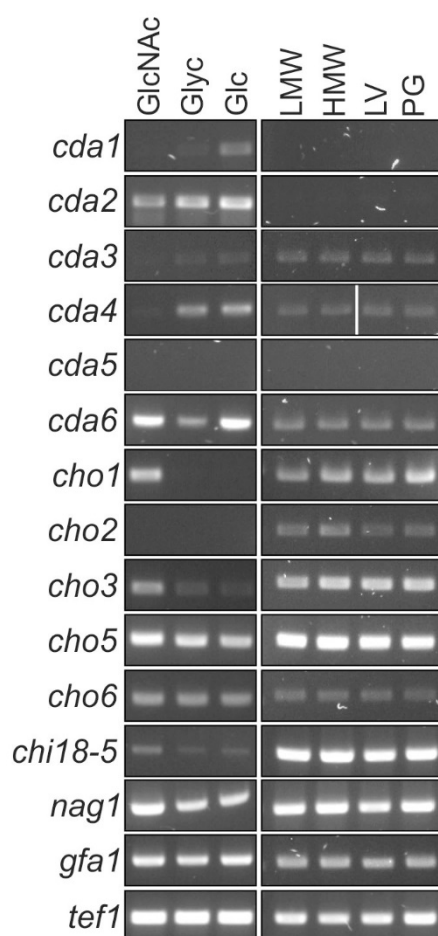

**Supplementary Figure S3: Differential expression of mycoparasitism related genes in *T. atroviride* in response to growth on chitosan.** RT-PCR was performed from 24 h cultures of *T. atroviride* grown in liquid minimal medium supplemented with 10 mg ml<sup>-1</sup> of the respective carbon source: *N*-acetylglucosamine (GlcNAc), glycerol (Glyc), glucose (Glc), low molecular weigh (LMW), high molecular weight (HMW), low viscous (LV), practical grade (PG) chitosan. The expression of the indicated genes was analysed by use of the RT-PCR primer pairs listed in the Supplementary Table S1.

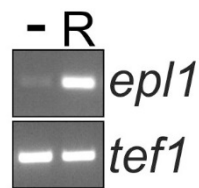

**Supplementary Figure S4: *T. atroviride* communicates with *Beta vulgaris* when colonizing its roots.** RT-PCR was performed from RNA extracted from *T. atroviride* colonizing 10 day old seedlings from *in vitro* culture and compared to *T. atroviride* cultured on cellophane as surface. The expression of the indicated genes was analysed by use of the RT-PCR primer pairs listed in the Supplementary Table S1.

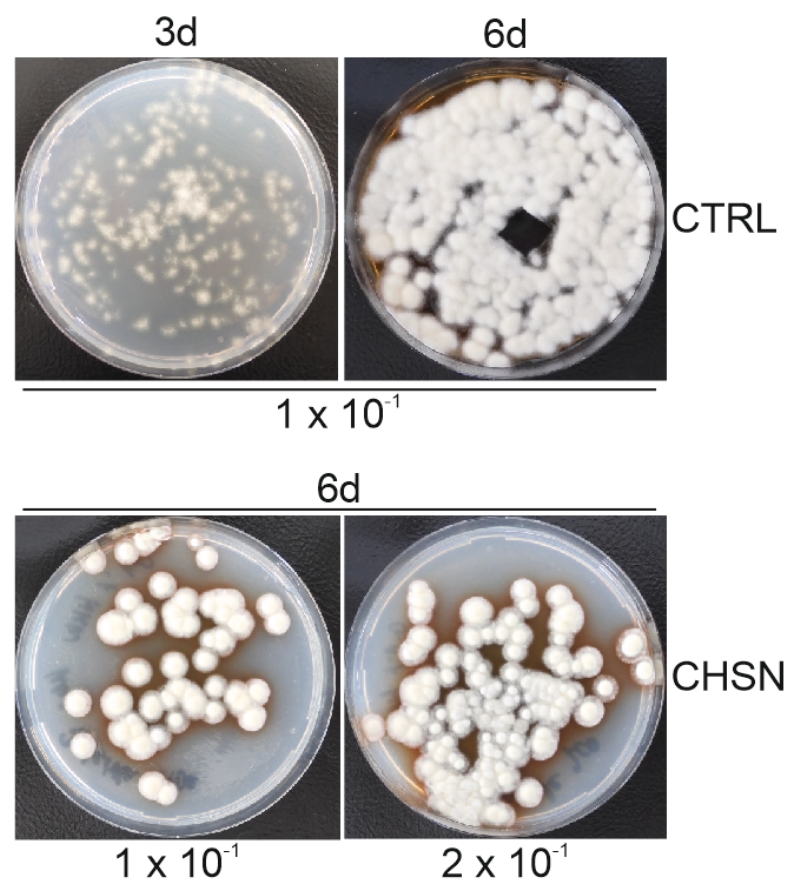

**Supplementary Figure S5: *C. beticola* colony formation from single spores.** Single spores of *C. beticola* were spread on PDA plates containing  $1 \text{ mg ml}^{-1}$  HMW chitosan (CHSN) and incubated for 6 days (6d) at  $25^\circ\text{C}$  in the dark. PDA plates served as control (CTRL) and were incubated for 3 (3d) and 6 (6d) days. A  $1 \times 10^{-1}$  dilution of the spore solution is shown for the CTRL condition and a  $1 \times 10^{-1}$  and  $2 \times 10^{-1}$  dilution are shown for CHSN.

## References

1. Gaderer, R. Functional characterization of a fungal gene family encoding plant defense response-eliciting proteins in *Trichoderma* biocontrol species. Master thesis, TU-Wien, Vienna, **2012**.
2. Takenaka, S.; Tamagake, H. Foliar spray of a cell wall protein fraction from the biocontrol agent *Pythium oligandrum* induces defence-related genes and increases resistance against *Cercospora* leaf spot in sugar beet. *J. Gen. Plant Pathol.* **2009**, *75*, 340–348, doi:10.1007/s10327-009-0186-9.
3. Schmidt, J.; Dotson, B.R.; Schmiderer, L.; van Tour, A.; Kumar, B.; Marttila, S.; Fredlund, K.M.; Widell, S.; Rasmusson, A.G. Substrate and plant genotype strongly influence the growth and gene expression response to *Trichoderma afroharzianum* T22 in sugar beet. *Plants (Basel)* **2020**, *9*, 1–14, doi:10.3390/plants9081005.
4. Stevanato, P.; Broccanello, C.; Moliterni, V.; Mandolino, G.; Barone, V.; Lucini, L.; Bertoldo, G.; Bertaggia, M.; Cagnin, M.; Pizzeghello, D. Innovative approaches to evaluate sugar beet responses to changes in sulfate availability. *Front. Plant Sci.* **2018**, *9*, 1–9, doi:10.3389/fpls.2018.00014.
